# Supplementary material for: Kinetic modeling of tricarboxylic acid cycle and glyoxylate bypass in Mycobacterium tuberculosis, and its application to assessment of drug targets
Source: PubMed Central journal article supplement (PMC1563452; doi:10.1186/1742-4682-3-27), 2006-08-03
Supplement: 1742-4682-3-27-S2.pdf [file 1742-4682-3-27-S2.pdf]

**Additional Table 2 - Kinetic constants of the enzymes in *M. tuberculosis* model-1 and model-2.** Vmax refers to maximal rate of an enzymatic reaction.  $K_{S1}$  and  $K_{S2}$  refer to the  $K_M$  values of substrates, and,  $K_{P1}$  and  $K_{P2}$  refer to the  $K_M$  values of products of the reactions. They are numbered in the order they appear in the chemical equations shown in the table.

| Reaction                | Enzyme                                        | Abbreviation | Vmax (in nmol/min/mg protein) | Vmax (mM/min)       | $K_{S1}$ (mM)          | $K_{S2}$ (mM)          | $K_{P1}$ (mM)           | $K_{P2}$ (mM)     |
|-------------------------|-----------------------------------------------|--------------|-------------------------------|---------------------|------------------------|------------------------|-------------------------|-------------------|
| $ACA + OAA = COA + CIT$ | citrate synthase                              | CS           | 405 [1]                       | 64.8                | 0.05 [2]               | 0.012 <sup>a</sup> [2] | 0.5                     | 0.12              |
| $CIT = ICIT$            | aconitase                                     | ACN          | 195 [1]                       | 31.2                | 1.7 <sup>b</sup> [2]   |                        | 0.7 <sup>c</sup> [2]    |                   |
| $ICIT = aKG$            | isocitrate dehydrogenase 1                    | ICD1         | 64 [1]                        | 10.2                | 0.03 [2]               |                        | 0.3                     |                   |
| $ICIT = aKG$            | isocitrate dehydrogenase 2                    | ICD2         | -                             | 9.965 <sup>d</sup>  | 0.06 <sup>d</sup>      |                        | 0.6                     |                   |
| $aKG = SCA^c$           | $\alpha$ -ketoglutarate dehydrogenase complex | KDH          | -                             | 57.344 <sup>f</sup> | 0.1 <sup>f</sup>       |                        | 1                       |                   |
| $SCA = SUC$             | succinyl-CoA synthetase                       | ScAS         | 7.5 [1]                       | 1.2                 | 0.02 <sup>g</sup> [2]  |                        | 5 <sup>h</sup> [2]      |                   |
| $aKG = SSA$             | $\alpha$ -ketoglutarate decarboxylase         | KGD          | -                             | 48.3 <sup>i</sup>   | 0.48 [1]               |                        | 4.8                     |                   |
| $SSA = SUC$             | succinic semialdehyde dehydrogenase           | SSADH        | 40.7 [1]                      | 6.51                | 0.015 <sup>j</sup> [2] |                        | 0.15                    |                   |
| $SUC = FA$              | succinate dehydrogenase                       | SDH          | 6.4 [1]                       | 1.02                | 0.15 <sup>k</sup> [2]  |                        | 0.12 <sup>k</sup> [2]   |                   |
| $FA = MAL$              | fumarase                                      | FUM          | 548 [1]                       | 87.7                | 0.25 <sup>l</sup> [2]  |                        | 2.38 <sup>l</sup> [2]   |                   |
| $MAL = OAA$             | malate dehydrogenase                          | MDH          | 1149 [1]                      | 184                 | 0.833 <sup>k</sup> [2] |                        | 0.0443 <sup>k</sup> [2] |                   |
| $ICIT = SUC + GLY$      | isocitrate lyase 1                            | ICL1         | 1.83 [3]                      | 1.172 <sup>m</sup>  | 0.145 [2]              |                        | 0.59 <sup>f</sup>       | 0.13 <sup>f</sup> |
| $ICIT = SUC + GLY$      | isocitrate lyase 2                            | ICL2         | -                             | 0.391 <sup>n</sup>  | 1.3 [4]                |                        | 5.9 <sup>o</sup>        | 1.3 <sup>o</sup>  |
| $GLY + ACA = MAL + COA$ | malate synthase                               | MS           | 125 [3]                       | 20                  | 0.057 [2]              | 0.03 [2]               | 1 <sup>f</sup>          | 0.1 <sup>f</sup>  |

**Notes for additional table 2**

<sup>a</sup>Value taken from *Bacillus megaterium*

<sup>b</sup>Value taken from *Bacillus subtilis*

<sup>c</sup>Value taken from *Bacillus cereus*

<sup>d</sup>Banerjee et. al [5] estimated the V<sub>max</sub> of purified ICD1 and ICD2, and Tian et. al [1] estimated the V<sub>max</sub> of ICD1 in cell lysate. Using the ratio of V<sub>max</sub> of purified ICD2 to V<sub>max</sub> of purified ICD1, and the V<sub>max</sub> of ICD1 in cell lysate, the V<sub>max</sub> of ICD2 in cell lysate was estimated. Similar logic was used to estimate the K<sub>M</sub> value of ICIT for ICD2

<sup>e</sup>This reaction is present only in *M. tuberculosis* model-1

<sup>f</sup>Value taken from *E. coli*

<sup>g</sup>Value taken from *Calliphoridae*

<sup>h</sup>Value taken from *Nitrosomonas europaea*

<sup>i</sup>Value was not available in cell lysate condition, so average of the V<sub>max</sub> of all TCA cycle enzymes was used

<sup>j</sup>Value taken from *Sus scrofa*

<sup>k</sup>Value taken from *Mycobacterium phlei*

<sup>l</sup>Value taken from bacterium

<sup>m</sup>Multiply the calculated V<sub>max</sub> (=0.293 mM/min) by 4 because ICL activity increases 4-fold in persistent mycobacteria [3]

<sup>n</sup>Logic similar to that used for the estimation of V<sub>max</sub> for ICD2 was used to estimate V<sub>max</sub> for ICL2 and K<sub>M</sub> value of ICIT for ICL2. The data on purified ICL1 and ICL2 were obtained from Bentrup et. al [4])

<sup>o</sup>Since the K<sub>M</sub> of ICIT for ICL2 is 10 times the K<sub>M</sub> of ICIT for ICL1 [4], the K<sub>M</sub> of the products i.e. SUC and GLY were also increased 10 fold.

## References

1. Tian J, Bryk R, Itoh M, Suematsu M, Nathan C: **Variante tricarboxylic acid cycle in *Mycobacterium tuberculosis*: Identification of  $\alpha$ -ketoglutarate decarboxylase.** *Proc Natl Acad Sci U S A* 2005, 102: 10670-10675
2. Schomburg I, Chang A, Schomburg D: **BRENDA, enzyme data and metabolic information.** *Nucleic Acids Res* 2002, 30: 47-49
3. Wayne LG, Lin KY: **Glyoxylate metabolism and adaptation of *Mycobacterium tuberculosis* to survival under anaerobic conditions.** *Infect Immun* 1982, 37: 1042-1049
4. Höner zu Bentrup K, Miczak A, Swenson DL, Russell DG: **Characterization of activity and expression of isocitrate lyase in *Mycobacterium avium* and *Mycobacterium tuberculosis*.** *J Bacteriol* 1999, 181: 7161-7167
5. Banerjee S, Nandyala A, Podili, R, Katoch VM, Hasnain SE: **Comparison of *Mycobacterium tuberculosis* isocitrate dehydrogenases (ICD-1 and ICD-2) reveals differences in coenzyme affinity, oligomeric state, pH tolerance and phylogenetic affiliation.** *BMC Biochem* 2005, 6: 20

## Abbreviations of metabolites

|      |                         |
|------|-------------------------|
| ACA  | acetyl-CoA              |
| OAA  | oxaloacetate            |
| COA  | CoA                     |
| CIT  | citrate                 |
| ICIT | isocitrate              |
| aKG  | $\alpha$ -ketoglutarate |
| SCA  | succinyl-CoA            |
| SUC  | succinate               |
| FA   | fumarate                |
| MAL  | malate                  |
| GLY  | glyoxylate              |
| SSA  | succinic semialdehyde   |
